# Supplementary material for: Spoilage Investigation of Chill Stored Meagre (Argyrosomus regius) Using Modern Microbiological and Analytical Techniques
Source: MDPI journal article supplement (doi:10.3390/foods10123109), 2021-12-15
Supplement: s1 [file s1]

**Table S1.** Number of reads and alpha diversity indices of evaluated samples.  
Whole (ArW) and filleted (ArF) chill-stored meagre caught in January  
(1) and July (2)

| Sample   | Number of<br>Raw Reads | Number of<br>Filtered Reads | Observed<br>Features | Shannon-<br>Weiner | Faith PD |
|----------|------------------------|-----------------------------|----------------------|--------------------|----------|
| ArW1_D3  | 43,502                 | 29,715                      | 65                   | 3.24               | 35.59    |
| ArW1_D6  | 14,056                 | 11,148                      | 67                   | 3.85               | 36.46    |
| ArW1_D12 | 14,166                 | 11,635                      | 54                   | 2.38               | 26.47    |
| ArW1_D15 | 34,888                 | 20,704                      | 42                   | 2.86               | 9.21     |
| ArW2_D3  | 11,897                 | 10,717                      | 51                   | 3.09               | 36.15    |
| ArW2_D6  | 26,853                 | 19,405                      | 96                   | 4.23               | 26.16    |
| ArW2_D12 | 34,019                 | 21,084                      | 84                   | 4.07               | 10.69    |
| ArW2_D15 | 24,682                 | 13,220                      | 45                   | 3.14               | 9.63     |
| ArF1_D3  | 8,998                  | 7,918                       | 46                   | 1.99               | 28.61    |
| ArF1_D5  | 41,112                 | 37,972                      | 74                   | 1.93               | 49.55    |
| ArF1_D7  | 20,293                 | 12,917                      | 72                   | 4.49               | 28.28    |
| ArF1_D9  | 36,684                 | 24,835                      | 64                   | 4.02               | 25.49    |
| ArF2_D3  | 9,000                  | 8,539                       | 31                   | 1.14               | 23.61    |
| ArF2_D5  | 15,308                 | 11,528                      | 54                   | 3.16               | 31.80    |
| ArF2_D7  | 14,454                 | 10,980                      | 63                   | 4.09               | 19.10    |
| ArF2_D9  | 25,595                 | 17,567                      | 28                   | 3.01               | 4.10     |

**Table S2.** Relative content (%) of volatile compounds in whole meagre during storage on ice. Values represent the mean content ( $\pm$  standard deviation) of three replicates for each sampling month.

| Compound             | January |      |       |      |        |      |        |      | July  |      |       |      |        |      |        |      |
|----------------------|---------|------|-------|------|--------|------|--------|------|-------|------|-------|------|--------|------|--------|------|
|                      | Day 3   |      | Day 6 |      | Day 12 |      | Day 15 |      | Day 3 |      | Day 6 |      | Day 12 |      | Day 15 |      |
| Ethanol              | 18.45   | 1.19 | 8.32  | 0.69 | 13.25  | 0.31 | 13.60  | 2.30 | 7.95  | 0.40 | 8.53  | 4.28 | 12.51  | 3.35 | 12.20  | 2.56 |
| 1-Propanol           | 0.06    | 0.02 | 0.07  | 0.04 | 0.04   | 0.01 | 0.09   | 0.01 | 0.04  | 0.00 | 0.03  | 0.00 | 0.03   | 0.00 | 0.04   | 0.00 |
| 1-Methoxy-2-propanol | 0.16    | 0.04 | 0.15  | 0.06 | 0.08   | 0.06 | 0.11   | 0.03 | 0.30  | 0.10 | 0.18  | 0.02 | 0.21   | 0.03 | 0.14   | 0.01 |
| 1-Butanol            | 0.25    | 0.04 | 0.21  | 0.05 | 0.11   | 0.01 | 0.13   | 0.01 | 0.37  | 0.08 | 0.15  | 0.03 | 0.20   | 0.02 | 0.14   | 0.02 |
| 1-Penten-3-ol        | 27.42   | 4.72 | 39.29 | 5.50 | 45.19  | 2.75 | 34.09  | 7.34 | 21.43 | 3.78 | 15.61 | 2.33 | 24.19  | 2.67 | 33.45  | 2.89 |
| 3-Penten-2-ol        | 0.10    | 0.03 | 0.33  | 0.17 | 0.32   | 0.05 | 0.19   | 0.11 | 0.07  | 0.01 | 0.05  | 0.01 | 0.10   | 0.02 | 0.17   | 0.01 |
| 3-Methyl-1-butanol   | 0.05    | 0.01 | 0.06  | 0.00 | 0.07   | 0.01 | 0.12   | 0.04 | 0.08  | 0.02 | 0.06  | 0.01 | 0.07   | 0.01 | 0.09   | 0.02 |
| 1-Pentanol           | 0.47    | 0.07 | 0.34  | 0.04 | 0.29   | 0.01 | 0.25   | 0.02 | 0.60  | 0.04 | 0.41  | 0.05 | 0.44   | 0.06 | 0.36   | 0.04 |
| (E)-2-Penten-1-ol    | 0.19    | 0.07 | 0.49  | 0.20 | 0.51   | 0.07 | 0.27   | 0.11 | 0.17  | 0.03 | 0.12  | 0.03 | 0.18   | 0.02 | 0.22   | 0.02 |
| (Z)-2-Penten-1-ol    | 3.46    | 1.42 | 8.16  | 3.48 | 9.72   | 1.48 | 4.15   | 1.69 | 2.61  | 0.56 | 1.61  | 0.48 | 2.93   | 0.58 | 4.15   | 0.90 |
| 3,4-Hexanediol       | 0.56    | 0.04 | 0.33  | 0.17 | 0.26   | 0.04 | 0.43   | 0.06 | 0.52  | 0.09 | 0.24  | 0.16 | 0.19   | 0.07 | 0.22   | 0.06 |
| (Z)-3-Hexen-1-ol     | 0.01    | 0.00 | 0.02  | 0.01 | 0.03   | 0.00 | 0.02   | 0.01 | 0.01  | 0.00 | 0.01  | 0.00 | 0.01   | 0.00 | 0.02   | 0.00 |
| 2-Butoxy-ethanol     | 0.37    | 0.05 | 0.27  | 0.01 | 0.28   | 0.03 | 0.23   | 0.05 | 0.67  | 0.14 | 0.52  | 0.04 | 0.41   | 0.02 | 0.41   | 0.06 |
| 1-Octen-3-ol         | 0.74    | 0.20 | 0.76  | 0.19 | 0.75   | 0.12 | 1.20   | 0.14 | 0.67  | 0.09 | 0.60  | 0.25 | 0.61   | 0.19 | 0.70   | 0.12 |
| 1-Heptanol           | 0.10    | 0.01 | 0.09  | 0.01 | 0.08   | 0.01 | 0.05   | 0.01 | 0.15  | 0.02 | 0.13  | 0.02 | 0.11   | 0.01 | 0.10   | 0.01 |
| 2-Ethyl-1-hexanol    | 2.48    | 0.03 | 1.83  | 0.17 | 1.58   | 0.29 | 1.09   | 0.21 | 3.98  | 0.69 | 3.51  | 0.48 | 2.65   | 0.20 | 2.59   | 0.43 |
| 1-Octanol            | 0.05    | 0.00 | 0.04  | 0.01 | 0.04   | 0.01 | 0.03   | 0.01 | 0.07  | 0.01 | 0.07  | 0.01 | 0.06   | 0.00 | 0.06   | 0.01 |
| 2,7-Octadien-1-ol    | 0.28    | 0.13 | 0.39  | 0.01 | 0.38   | 0.02 | 0.31   | 0.03 | 0.27  | 0.04 | 0.21  | 0.06 | 0.23   | 0.05 | 0.28   | 0.05 |
| Benzyl alcohol       | 0.04    | 0.00 | 0.03  | 0.00 | 0.08   | 0.01 | 0.04   | 0.01 | 0.06  | 0.01 | 0.05  | 0.01 | 0.05   | 0.00 | 0.05   | 0.01 |
| Sum of Alcohols      | 55.22   | 5.08 | 61.16 | 6.56 | 73.08  | 3.16 | 56.39  | 7.88 | 40.02 | 3.91 | 32.10 | 4.93 | 45.20  | 4.33 | 55.40  | 4.00 |
| Acetaldehyde         | 5.65    | 1.04 | 4.46  | 1.26 | 3.95   | 0.47 | 4.79   | 0.71 | 3.93  | 0.15 | 2.71  | 0.69 | 3.21   | 0.24 | 2.65   | 0.99 |
| Propanal             | 3.33    | 0.45 | 4.00  | 2.33 | 2.17   | 0.17 | 2.63   | 0.73 | 4.11  | 0.80 | 3.36  | 0.16 | 3.62   | 0.37 | 2.53   | 0.66 |
| Butanal              | 0.40    | 0.04 | 0.48  | 0.21 | 0.31   | 0.01 | 0.40   | 0.05 | 0.34  | 0.05 | 0.33  | 0.04 | 0.41   | 0.03 | 0.30   | 0.09 |

| Compound                    | January |      |       |      |        |      |        |      | July  |      |       |      |        |      |        |      |
|-----------------------------|---------|------|-------|------|--------|------|--------|------|-------|------|-------|------|--------|------|--------|------|
|                             | Day 3   |      | Day 6 |      | Day 12 |      | Day 15 |      | Day 3 |      | Day 6 |      | Day 12 |      | Day 15 |      |
| 2-Methylbutanal             | 0.07    | 0.01 | 0.07  | 0.02 | 0.05   | 0.01 | 0.18   | 0.05 | 0.13  | 0.03 | 0.10  | 0.01 | 0.13   | 0.03 | 0.10   | 0.00 |
| 3-Methylbutanal             | 0.10    | 0.02 | 0.12  | 0.02 | 0.09   | 0.02 | 0.33   | 0.10 | 0.17  | 0.02 | 0.14  | 0.01 | 0.19   | 0.04 | 0.16   | 0.00 |
| Pentanal                    | 0.38    | 0.12 | 0.39  | 0.11 | 0.27   | 0.01 | 0.31   | 0.02 | 0.21  | 0.01 | 0.19  | 0.02 | 0.28   | 0.02 | 0.22   | 0.06 |
| Hexanal                     | 1.80    | 0.37 | 1.80  | 0.74 | 1.08   | 0.04 | 1.53   | 0.21 | 1.77  | 0.22 | 1.59  | 0.16 | 1.66   | 0.26 | 1.29   | 0.17 |
| (E)-2-Pentenal              | 0.05    | 0.02 | 0.09  | 0.01 | 0.06   | 0.01 | 0.06   | 0.01 | 0.04  | 0.00 | 0.03  | 0.01 | 0.04   | 0.00 | 0.03   | 0.00 |
| Heptanal                    | 0.21    | 0.01 | 0.12  | 0.02 | 0.09   | 0.01 | 0.11   | 0.00 | 0.32  | 0.02 | 0.15  | 0.01 | 0.13   | 0.01 | 0.10   | 0.02 |
| (E)-2-Hexenal               | 0.04    | 0.01 | 0.06  | 0.02 | 0.04   | 0.00 | 0.05   | 0.00 | 0.03  | 0.01 | 0.03  | 0.01 | 0.03   | 0.01 | 0.03   | 0.00 |
| Octanal                     | 0.17    | 0.01 | 0.11  | 0.01 | 0.09   | 0.01 | 0.08   | 0.01 | 0.26  | 0.02 | 0.17  | 0.02 | 0.14   | 0.01 | 0.13   | 0.02 |
| Nonanal                     | 0.09    | 0.01 | 0.09  | 0.00 | 0.09   | 0.01 | 0.07   | 0.01 | 0.14  | 0.02 | 0.16  | 0.03 | 0.15   | 0.02 | 0.14   | 0.02 |
| 2,4-Heptadienal_isomer 1    | 0.26    | 0.15 | 0.23  | 0.09 | 0.17   | 0.04 | 0.19   | 0.05 | 0.13  | 0.04 | 0.09  | 0.05 | 0.11   | 0.02 | 0.10   | 0.02 |
| 2,4-Heptadienal_isomer 2    | 0.14    | 0.09 | 0.16  | 0.04 | 0.13   | 0.04 | 0.11   | 0.01 | 0.11  | 0.04 | 0.08  | 0.04 | 0.09   | 0.02 | 0.09   | 0.02 |
| Benzaldehyde                | 0.46    | 0.01 | 0.30  | 0.03 | 0.22   | 0.01 | 0.21   | 0.01 | 0.70  | 0.07 | 0.35  | 0.03 | 0.30   | 0.01 | 0.27   | 0.02 |
| Sum of Aldehydes            | 13.13   | 1.21 | 12.48 | 2.77 | 8.82   | 0.50 | 11.05  | 1.05 | 12.40 | 0.85 | 9.48  | 0.73 | 10.49  | 0.51 | 8.14   | 1.21 |
| Acetone                     | 8.95    | 3.43 | 12.36 | 0.83 | 4.51   | 0.26 | 4.90   | 0.93 | 15.26 | 3.02 | 40.04 | 2.79 | 20.13  | 1.21 | 10.04  | 0.14 |
| 2-Butanone                  | 0.32    | 0.20 | 0.26  | 0.02 | 0.08   | 0.01 | 0.11   | 0.02 | 0.20  | 0.02 | 0.16  | 0.05 | 0.23   | 0.02 | 0.23   | 0.02 |
| 2,3-Butanedione             | 0.22    | 0.02 | 0.17  | 0.05 | 0.13   | 0.00 | 0.23   | 0.02 | 0.18  | 0.01 | 0.13  | 0.01 | 0.15   | 0.02 | 0.19   | 0.01 |
| 2,3-Pentanedione            | 0.91    | 0.35 | 1.25  | 0.66 | 0.51   | 0.02 | 0.60   | 0.15 | 0.76  | 0.16 | 0.65  | 0.09 | 0.71   | 0.07 | 0.56   | 0.06 |
| 2,3-Hexanedione             | 0.12    | 0.04 | 0.15  | 0.04 | 0.08   | 0.01 | 0.08   | 0.02 | 0.08  | 0.01 | 0.07  | 0.01 | 0.08   | 0.01 | 0.07   | 0.01 |
| Acetoin                     | 4.01    | 0.90 | 0.78  | 0.38 | 0.92   | 0.19 | 1.39   | 0.12 | 3.58  | 0.62 | 1.39  | 0.46 | 1.16   | 0.23 | 1.94   | 0.56 |
| 2,3-Octanedione             | 0.04    | 0.02 | 0.06  | 0.02 | 0.04   | 0.01 | 0.03   | 0.00 | 0.06  | 0.01 | 0.06  | 0.01 | 0.05   | 0.02 | 0.05   | 0.01 |
| 5-Hepten-2-one, 6-methyl-   | 0.03    | 0.01 | 0.03  | 0.00 | 0.02   | 0.00 | 0.03   | 0.00 | 0.03  | 0.00 | 0.04  | 0.01 | 0.05   | 0.01 | 0.04   | 0.01 |
| 3,5-Octadien-2-one_isomer 1 | 0.17    | 0.05 | 0.26  | 0.11 | 0.17   | 0.03 | 0.32   | 0.05 | 0.12  | 0.03 | 0.11  | 0.05 | 0.11   | 0.05 | 0.11   | 0.03 |
| 3,5-Octadien-2-one_isomer 2 | 0.04    | 0.01 | 0.06  | 0.01 | 0.05   | 0.01 | 0.08   | 0.01 | 0.04  | 0.01 | 0.03  | 0.01 | 0.04   | 0.01 | 0.03   | 0.01 |
| Acetophenone                | 0.12    | 0.01 | 0.09  | 0.01 | 0.10   | 0.01 | 0.11   | 0.02 | 0.19  | 0.02 | 0.21  | 0.06 | 0.16   | 0.01 | 0.18   | 0.04 |
| Sum of Ketones              | 14.93   | 3.57 | 15.46 | 1.13 | 6.62   | 0.33 | 7.88   | 0.96 | 20.50 | 3.09 | 42.89 | 2.83 | 22.88  | 1.23 | 13.45  | 0.58 |

| Compound                            | January |      |       |      |        |      |        |      | July  |      |       |      |        |      |        |      |
|-------------------------------------|---------|------|-------|------|--------|------|--------|------|-------|------|-------|------|--------|------|--------|------|
|                                     | Day 3   |      | Day 6 |      | Day 12 |      | Day 15 |      | Day 3 |      | Day 6 |      | Day 12 |      | Day 15 |      |
| Hexane                              | 0.13    | 0.07 | 0.09  | 0.04 | 0.06   | 0.01 | 0.09   | 0.03 | 0.21  | 0.03 | 0.17  | 0.05 | 0.14   | 0.02 | 0.15   | 0.03 |
| Octane                              | 0.01    | 0.00 | 0.01  | 0.01 | 0.00   | 0.00 | 0.02   | 0.01 | 0.02  | 0.00 | 0.01  | 0.00 | 0.01   | 0.00 | 0.01   | 0.00 |
| Heptane, 2,4-dimethyl-              | 0.60    | 0.24 | 0.35  | 0.31 | 0.06   | 0.01 | 0.46   | 0.15 | 0.67  | 0.25 | 0.05  | 0.01 | 0.21   | 0.05 | 0.11   | 0.05 |
| 2,4-Octadiene_isomer 1              | 0.02    | 0.01 | 0.02  | 0.01 | 0.01   | 0.01 | 0.05   | 0.02 | 0.01  | 0.00 | 0.00  | 0.00 | 0.01   | 0.00 | 0.01   | 0.00 |
| 2,4-Octadiene_isomer 2              | 0.02    | 0.01 | 0.01  | 0.01 | 0.01   | 0.00 | 0.03   | 0.01 | 0.01  | 0.00 | 0.00  | 0.00 | 0.01   | 0.00 | 0.01   | 0.00 |
| Heptane, 2,2,4,6,6-pentamethyl-     | 1.11    | 0.36 | 0.63  | 0.48 | 0.17   | 0.03 | 0.89   | 0.12 | 1.70  | 0.30 | 0.74  | 0.12 | 1.30   | 0.31 | 0.81   | 0.14 |
| Decane                              | 0.02    | 0.01 | 0.01  | 0.01 | 0.01   | 0.00 | 0.03   | 0.01 | 0.03  | 0.01 | 0.01  | 0.00 | 0.02   | 0.00 | 0.02   | 0.00 |
| Alkane_1011                         | 0.34    | 0.04 | 0.22  | 0.08 | 0.10   | 0.02 | 0.19   | 0.03 | 0.40  | 0.12 | 0.14  | 0.01 | 0.19   | 0.02 | 0.15   | 0.04 |
| Alkane_1036                         | 0.75    | 0.08 | 0.39  | 0.04 | 0.20   | 0.03 | 0.29   | 0.05 | 1.00  | 0.24 | 0.41  | 0.06 | 0.35   | 0.07 | 0.30   | 0.08 |
| Alkane_1041                         | 0.31    | 0.03 | 0.15  | 0.02 | 0.07   | 0.01 | 0.09   | 0.01 | 0.40  | 0.10 | 0.15  | 0.02 | 0.14   | 0.02 | 0.11   | 0.02 |
| Alkane_1083                         | 0.38    | 0.02 | 0.21  | 0.01 | 0.14   | 0.02 | 0.13   | 0.01 | 0.57  | 0.10 | 0.29  | 0.04 | 0.24   | 0.03 | 0.21   | 0.04 |
| Alkane_1088                         | 0.19    | 0.01 | 0.11  | 0.00 | 0.06   | 0.01 | 0.06   | 0.01 | 0.27  | 0.04 | 0.14  | 0.03 | 0.12   | 0.01 | 0.10   | 0.02 |
| Undecane                            | 0.01    | 0.00 | 0.01  | 0.00 | 0.00   | 0.00 | 0.01   | 0.00 | 0.02  | 0.00 | 0.01  | 0.00 | 0.01   | 0.00 | 0.01   | 0.00 |
| Dodecane                            | 0.51    | 0.07 | 0.34  | 0.06 | 0.39   | 0.06 | 0.58   | 0.05 | 1.14  | 0.27 | 0.56  | 0.03 | 0.80   | 0.13 | 0.66   | 0.17 |
| Alkane_1250                         | 0.11    | 0.01 | 0.10  | 0.02 | 0.08   | 0.02 | 0.05   | 0.01 | 0.14  | 0.05 | 0.14  | 0.01 | 0.10   | 0.01 | 0.11   | 0.02 |
| Tridecane                           | 0.10    | 0.02 | 0.08  | 0.01 | 0.08   | 0.01 | 0.08   | 0.01 | 0.19  | 0.04 | 0.11  | 0.02 | 0.13   | 0.02 | 0.14   | 0.03 |
| Tetradecane                         | 0.04    | 0.01 | 0.04  | 0.01 | 0.04   | 0.00 | 0.04   | 0.01 | 0.08  | 0.02 | 0.05  | 0.01 | 0.05   | 0.01 | 0.06   | 0.01 |
| Alkane_1490                         | 2.01    | 0.66 | 2.07  | 0.35 | 2.38   | 0.25 | 2.90   | 0.27 | 1.45  | 0.20 | 1.17  | 0.47 | 1.21   | 0.36 | 1.51   | 0.27 |
| Pentadecane                         | 0.13    | 0.03 | 0.11  | 0.02 | 0.12   | 0.01 | 0.12   | 0.02 | 0.48  | 0.15 | 0.25  | 0.08 | 0.33   | 0.04 | 0.30   | 0.07 |
| Pentadecane, 2,6,10,14-tetramethyl- | 1.31    | 0.15 | 0.97  | 0.17 | 1.68   | 0.09 | 1.15   | 0.08 | 2.02  | 0.42 | 2.11  | 0.62 | 2.13   | 0.25 | 2.32   | 0.46 |
| Heptadecane                         | 0.38    | 0.06 | 0.33  | 0.05 | 0.38   | 0.03 | 0.35   | 0.05 | 0.67  | 0.17 | 0.69  | 0.22 | 0.65   | 0.08 | 0.64   | 0.09 |
| Sum of Aliphatic Hydrocarbons       | 8.48    | 0.82 | 6.24  | 0.70 | 6.03   | 0.28 | 7.62   | 0.36 | 11.49 | 0.77 | 7.19  | 0.83 | 8.16   | 0.57 | 7.73   | 0.60 |
| Benzene                             | 0.17    | 0.02 | 0.09  | 0.04 | 0.09   | 0.01 | 0.62   | 0.12 | 0.33  | 0.07 | 0.09  | 0.00 | 0.09   | 0.01 | 0.61   | 0.53 |
| Toluene                             | 0.88    | 0.08 | 0.20  | 0.09 | 0.21   | 0.05 | 0.27   | 0.06 | 1.67  | 0.33 | 0.25  | 0.02 | 0.26   | 0.03 | 0.26   | 0.06 |
| Ethylbenzene                        | 0.28    | 0.02 | 0.08  | 0.03 | 0.07   | 0.01 | 0.13   | 0.02 | 0.60  | 0.09 | 0.13  | 0.01 | 0.14   | 0.02 | 0.16   | 0.03 |

| Compound                     | January |      |       |      |        |      |        |      | July  |      |       |      |        |      |        |      |
|------------------------------|---------|------|-------|------|--------|------|--------|------|-------|------|-------|------|--------|------|--------|------|
|                              | Day 3   |      | Day 6 |      | Day 12 |      | Day 15 |      | Day 3 |      | Day 6 |      | Day 12 |      | Day 15 |      |
| p-Xylene                     | 0.12    | 0.01 | 0.04  | 0.02 | 0.03   | 0.01 | 0.06   | 0.01 | 0.27  | 0.05 | 0.05  | 0.00 | 0.06   | 0.01 | 0.06   | 0.01 |
| m-Xylene                     | 0.39    | 0.03 | 0.12  | 0.05 | 0.11   | 0.02 | 0.18   | 0.03 | 0.88  | 0.15 | 0.17  | 0.01 | 0.19   | 0.02 | 0.19   | 0.03 |
| o-Xylene                     | 0.22    | 0.02 | 0.07  | 0.02 | 0.06   | 0.01 | 0.10   | 0.02 | 0.48  | 0.07 | 0.10  | 0.01 | 0.11   | 0.01 | 0.12   | 0.02 |
| Styrene                      | 0.14    | 0.01 | 0.02  | 0.00 | 0.02   | 0.00 | 0.03   | 0.00 | 0.30  | 0.05 | 0.07  | 0.01 | 0.05   | 0.01 | 0.08   | 0.02 |
| Naphthalene                  | 0.08    | 0.01 | 0.05  | 0.00 | 0.04   | 0.01 | 0.04   | 0.01 | 0.11  | 0.01 | 0.08  | 0.02 | 0.08   | 0.01 | 0.07   | 0.01 |
| Sum of Aromatic Hydrocarbons | 2.28    | 0.09 | 0.67  | 0.12 | 0.64   | 0.06 | 1.44   | 0.14 | 4.65  | 0.39 | 0.94  | 0.03 | 0.98   | 0.05 | 1.54   | 0.54 |
| Methyl Acetate               | 0.09    | 0.04 | 0.01  | 0.00 | 0.01   | 0.00 | 0.02   | 0.01 | 0.13  | 0.03 | 0.02  | 0.01 | 0.03   | 0.00 | 0.05   | 0.03 |
| Ethyl Acetate                | 2.03    | 0.74 | 0.60  | 0.06 | 0.56   | 0.10 | 0.52   | 0.16 | 3.44  | 0.68 | 0.94  | 0.27 | 0.99   | 0.05 | 0.93   | 0.06 |
| 3-Methylbutyl acetate        | 0.03    | 0.01 | 0.02  | 0.00 | 0.02   | 0.00 | 0.10   | 0.01 | 0.04  | 0.00 | 0.04  | 0.01 | 0.04   | 0.00 | 0.05   | 0.04 |
| Ethyl 2-hydroxypropanoate    | 0.27    | 0.02 | 0.18  | 0.00 | 0.26   | 0.01 | 0.28   | 0.09 | 0.27  | 0.01 | 0.27  | 0.05 | 0.24   | 0.01 | 0.21   | 0.03 |
| Ethyl decanoate              | 0.02    | 0.00 | 0.01  | 0.00 | 0.02   | 0.01 | 0.03   | 0.01 | 0.01  | 0.00 | 0.00  | 0.00 | 0.01   | 0.00 | 0.01   | 0.01 |
| Sum of Esters                | 2.45    | 0.74 | 0.83  | 0.06 | 0.87   | 0.10 | 0.96   | 0.19 | 3.89  | 0.68 | 1.28  | 0.28 | 1.29   | 0.05 | 1.24   | 0.08 |
| Acetic acid                  | 0.31    | 0.14 | 0.14  | 0.00 | 0.15   | 0.05 | 0.39   | 0.25 | 0.59  | 0.24 | 0.30  | 0.03 | 0.41   | 0.11 | 0.43   | 0.09 |
| Propanoic acid               | 0.03    | 0.00 | 0.02  | 0.01 | 0.02   | 0.00 | 0.03   | 0.01 | 0.04  | 0.01 | 0.03  | 0.01 | 0.02   | 0.00 | 0.02   | 0.00 |
| Butanoic acid                | 0.13    | 0.03 | 0.07  | 0.01 | 0.05   | 0.01 | 0.27   | 0.14 | 0.43  | 0.19 | 0.20  | 0.07 | 0.16   | 0.06 | 0.18   | 0.06 |
| 3-Methylbutanoic acid        | 0.03    | 0.01 | 0.03  | 0.01 | 0.02   | 0.00 | 0.11   | 0.02 | 0.02  | 0.00 | 0.02  | 0.01 | 0.03   | 0.01 | 0.13   | 0.04 |
| Hexanoic acid                | 0.08    | 0.03 | 0.06  | 0.02 | 0.05   | 0.00 | 0.12   | 0.04 | 0.14  | 0.03 | 0.14  | 0.05 | 0.08   | 0.02 | 0.13   | 0.05 |
| Octanoic acid                | 0.03    | 0.03 | 0.02  | 0.00 | 0.03   | 0.02 | 0.02   | 0.00 | 0.04  | 0.01 | 0.03  | 0.01 | 0.02   | 0.01 | 0.05   | 0.02 |
| Nonanoic acid                | 0.06    | 0.05 | 0.03  | 0.00 | 0.09   | 0.06 | 0.03   | 0.00 | 0.06  | 0.00 | 0.05  | 0.01 | 0.04   | 0.00 | 0.07   | 0.03 |
| Sum of Acids                 | 0.67    | 0.16 | 0.37  | 0.03 | 0.42   | 0.08 | 0.99   | 0.29 | 1.32  | 0.31 | 0.77  | 0.10 | 0.77   | 0.13 | 1.00   | 0.13 |
| a-Pinene                     | 0.66    | 0.21 | 0.38  | 0.32 | 0.13   | 0.01 | 0.58   | 0.18 | 0.83  | 0.09 | 0.24  | 0.03 | 0.44   | 0.10 | 0.24   | 0.05 |
| b-Pinene                     | 0.06    | 0.01 | 0.03  | 0.02 | 0.01   | 0.00 | 0.04   | 0.01 | 0.11  | 0.01 | 0.03  | 0.00 | 0.04   | 0.01 | 0.03   | 0.01 |
| Thuja-2,4(10)-diene          | 0.08    | 0.02 | 0.01  | 0.01 | 0.01   | 0.00 | 0.03   | 0.01 | 0.12  | 0.01 | 0.02  | 0.00 | 0.02   | 0.00 | 0.01   | 0.00 |
| 3-Carene                     | 0.05    | 0.01 | 0.02  | 0.01 | 0.02   | 0.00 | 0.03   | 0.01 | 0.09  | 0.01 | 0.03  | 0.00 | 0.04   | 0.00 | 0.03   | 0.01 |
| b-Myrcene                    | 0.04    | 0.01 | 0.03  | 0.01 | 0.02   | 0.00 | 0.04   | 0.01 | 0.07  | 0.01 | 0.03  | 0.00 | 0.05   | 0.01 | 0.04   | 0.01 |

| Compound                 | January |      |       |      |        |      |        |      | July  |      |       |      |        |      |        |      |
|--------------------------|---------|------|-------|------|--------|------|--------|------|-------|------|-------|------|--------|------|--------|------|
|                          | Day 3   |      | Day 6 |      | Day 12 |      | Day 15 |      | Day 3 |      | Day 6 |      | Day 12 |      | Day 15 |      |
| D-Limonene               | 0.70    | 0.21 | 0.61  | 0.06 | 0.50   | 0.06 | 0.60   | 0.12 | 1.00  | 0.13 | 0.89  | 0.19 | 1.06   | 0.05 | 0.85   | 0.13 |
| g-Terpinene              | 0.12    | 0.04 | 0.09  | 0.07 | 0.04   | 0.01 | 0.15   | 0.05 | 0.16  | 0.02 | 0.04  | 0.01 | 0.09   | 0.02 | 0.06   | 0.01 |
| p-Cymene                 | 0.42    | 0.08 | 0.32  | 0.23 | 0.18   | 0.03 | 0.51   | 0.17 | 0.84  | 0.10 | 0.21  | 0.04 | 0.38   | 0.09 | 0.31   | 0.08 |
| Terpene_alcohol_1476     | 0.03    | 0.01 | 0.02  | 0.01 | 0.04   | 0.02 | 0.06   | 0.02 | 0.04  | 0.00 | 0.05  | 0.01 | 0.05   | 0.01 | 0.08   | 0.05 |
| b-Gurjunene              | 0.14    | 0.02 | 0.09  | 0.01 | 0.09   | 0.01 | 0.10   | 0.01 | 0.25  | 0.04 | 0.17  | 0.04 | 0.20   | 0.03 | 0.18   | 0.03 |
| Calamenene               | 0.03    | 0.01 | 0.02  | 0.01 | 0.02   | 0.00 | 0.02   | 0.00 | 0.05  | 0.01 | 0.05  | 0.01 | 0.05   | 0.01 | 0.05   | 0.00 |
| Sum of Terpenoids        | 2.32    | 0.31 | 1.64  | 0.41 | 1.05   | 0.07 | 2.16   | 0.28 | 3.57  | 0.19 | 1.76  | 0.20 | 2.41   | 0.15 | 1.88   | 0.17 |
| Trimethylamine           | 0.27    | 0.29 | 0.92  | 1.26 | 2.29   | 2.44 | 11.35  | 3.90 | 1.77  | 2.26 | 3.24  | 0.92 | 7.53   | 0.76 | 9.42   | 2.92 |
| Dimethyl sulfide         | 0.02    | 0.01 | 0.02  | 0.00 | 0.01   | 0.00 | 0.01   | 0.00 | 0.08  | 0.01 | 0.05  | 0.01 | 0.04   | 0.01 | 0.04   | 0.01 |
| 2-Ethylfuran             | 0.09    | 0.04 | 0.11  | 0.05 | 0.05   | 0.01 | 0.09   | 0.02 | 0.09  | 0.01 | 0.07  | 0.01 | 0.07   | 0.01 | 0.05   | 0.01 |
| 2-Pentylfuran            | 0.09    | 0.01 | 0.03  | 0.01 | 0.02   | 0.00 | 0.04   | 0.01 | 0.17  | 0.02 | 0.04  | 0.00 | 0.04   | 0.00 | 0.03   | 0.01 |
| 2,4,6-Trimethyl-pyridine | 0.06    | 0.01 | 0.07  | 0.05 | 0.09   | 0.07 | 0.04   | 0.03 | 0.06  | 0.05 | 0.20  | 0.02 | 0.13   | 0.01 | 0.06   | 0.02 |
| Sum of Miscellaneous     | 0.53    | 0.29 | 1.16  | 1.26 | 2.47   | 2.44 | 11.52  | 3.90 | 2.16  | 2.26 | 3.59  | 0.92 | 7.81   | 0.76 | 9.62   | 2.92 |

**Table S3.** Relative content (%) of volatile compounds in filleted meagre during storage at 4 °C. Values represent the mean content ( $\pm$  standard deviation) of three replicates for each sampling month.

| Compound             | January |      |       |      |       |      |       |      | July  |      |       |      |       |      |       |      |
|----------------------|---------|------|-------|------|-------|------|-------|------|-------|------|-------|------|-------|------|-------|------|
|                      | Day 3   |      | Day 5 |      | Day 7 |      | Day 9 |      | Day 3 |      | Day 5 |      | Day 7 |      | Day 9 |      |
| 2-Methyl-2-propanol  | 0.12    | 0.05 | 0.19  | 0.05 | 0.15  | 0.02 | 0.16  | 0.01 | 0.14  | 0.06 | 0.12  | 0.15 | 0.35  | 0.22 | 0.14  | 0.01 |
| Ethanol              | 22.57   | 9.46 | 15.70 | 2.54 | 17.50 | 3.65 | 12.97 | 3.84 | 20.40 | 1.86 | 5.64  | 2.51 | 14.53 | 0.78 | 8.17  | 2.16 |
| 1-Propanol           | 0.03    | 0.01 | 0.02  | 0.00 | 0.02  | 0.00 | 0.02  | 0.00 | 0.02  | 0.00 | 0.02  | 0.00 | 0.02  | 0.00 | 0.02  | 0.00 |
| 1-Methoxy-2-propanol | 0.16    | 0.05 | 0.25  | 0.09 | 0.21  | 0.04 | 0.10  | 0.02 | 0.25  | 0.10 | 0.60  | 0.24 | 0.44  | 0.04 | 0.26  | 0.10 |
| 1-Butanol            | 0.14    | 0.01 | 0.61  | 0.20 | 0.63  | 0.16 | 0.29  | 0.13 | 0.43  | 0.04 | 0.50  | 0.18 | 1.07  | 0.55 | 0.40  | 0.13 |
| 1-Penten-3-ol        | 27.02   | 2.78 | 25.16 | 6.75 | 34.23 | 0.66 | 34.08 | 7.49 | 28.42 | 3.10 | 34.57 | 6.61 | 16.51 | 1.84 | 24.38 | 4.04 |
| 3-Penten-2-ol        | 0.06    | 0.02 | 0.05  | 0.02 | 0.05  | 0.00 | 0.07  | 0.01 | 0.06  | 0.01 | 0.05  | 0.01 | 0.02  | 0.00 | 0.05  | 0.01 |
| 3-Methyl-1-butanol   | 0.05    | 0.00 | 0.07  | 0.01 | 0.07  | 0.00 | 0.10  | 0.03 | 0.08  | 0.02 | 0.09  | 0.02 | 0.11  | 0.01 | 0.11  | 0.02 |
| 1-Pentanol           | 0.49    | 0.10 | 0.32  | 0.04 | 0.23  | 0.02 | 0.23  | 0.02 | 0.40  | 0.06 | 0.42  | 0.13 | 0.33  | 0.02 | 0.32  | 0.04 |
| (E)-2-Penten-1-ol    | 0.25    | 0.06 | 0.18  | 0.09 | 0.19  | 0.01 | 0.27  | 0.02 | 0.25  | 0.04 | 0.18  | 0.01 | 0.14  | 0.00 | 0.20  | 0.05 |
| (Z)-2-Penten-1-ol    | 3.31    | 0.10 | 3.06  | 2.02 | 4.24  | 0.72 | 5.19  | 0.60 | 3.80  | 0.59 | 4.36  | 0.95 | 1.65  | 0.24 | 2.73  | 0.81 |
| 3,4-Hexanediol       | 0.37    | 0.11 | 0.38  | 0.06 | 0.26  | 0.08 | 0.32  | 0.10 | 0.19  | 0.05 | 0.09  | 0.05 | 0.10  | 0.01 | 0.22  | 0.07 |
| (Z)3-Hexen-1-ol      | 0.05    | 0.01 | 0.04  | 0.00 | 0.04  | 0.00 | 0.04  | 0.00 | 0.18  | 0.03 | 0.17  | 0.09 | 0.11  | 0.01 | 0.08  | 0.01 |
| 2-Butoxy-ethanol     | 0.53    | 0.08 | 0.54  | 0.05 | 0.65  | 0.10 | 0.38  | 0.02 | 0.77  | 0.20 | 0.73  | 0.14 | 1.29  | 0.11 | 0.79  | 0.12 |
| 1-Octen-3-ol         | 0.66    | 0.14 | 0.80  | 0.18 | 0.54  | 0.05 | 0.84  | 0.10 | 0.59  | 0.14 | 0.61  | 0.18 | 0.45  | 0.06 | 0.89  | 0.28 |
| 1-Heptanol           | 0.03    | 0.00 | 0.03  | 0.00 | 0.03  | 0.00 | 0.02  | 0.00 | 0.03  | 0.03 | 0.04  | 0.10 | 0.05  | 0.00 | 0.04  | 0.01 |
| 2-Ethyl-1-hexanol    | 0.61    | 0.08 | 0.72  | 0.07 | 0.84  | 0.12 | 0.45  | 0.04 | 0.77  | 0.10 | 0.86  | 2.03 | 1.05  | 0.16 | 0.72  | 0.10 |
| 1-Octanol            | 0.07    | 0.01 | 0.05  | 0.01 | 0.07  | 0.01 | 0.05  | 0.00 | 0.09  | 0.02 | 0.09  | 0.01 | 0.11  | 0.02 | 0.08  | 0.01 |
| 2,3-Butanediol       | 1.16    | 0.95 | 1.74  | 0.74 | 0.17  | 0.04 | 0.12  | 0.05 | 0.12  | 0.04 | 0.09  | 0.18 | 0.13  | 0.02 | 0.10  | 0.03 |
| 2,7-Octadien-1-ol    | 0.01    | 0.01 | 0.01  | 0.00 | 0.03  | 0.02 | 0.01  | 0.00 | 0.00  | 0.00 | 0.00  | 0.01 | 0.05  | 0.05 | 0.01  | 0.00 |
| Benzyl alcohol       | 0.05    | 0.01 | 0.08  | 0.01 | 0.07  | 0.01 | 0.05  | 0.00 | 0.09  | 0.01 | 0.09  | 0.02 | 0.09  | 0.01 | 0.07  | 0.01 |
| Sum of Alcohols      | 57.73   | 9.91 | 50.01 | 7.54 | 60.22 | 3.78 | 55.76 | 8.44 | 57.08 | 3.67 | 49.34 | 7.43 | 38.60 | 2.11 | 39.76 | 4.67 |
| Acetaldehyde         | 6.38    | 0.42 | 6.16  | 0.58 | 6.06  | 1.40 | 5.71  | 0.37 | 4.93  | 0.40 | 4.11  | 0.06 | 4.26  | 0.11 | 3.73  | 0.27 |

| Compound                    | January |      |       |      |       |      |       |      | July  |      |       |      |       |      |       |      |
|-----------------------------|---------|------|-------|------|-------|------|-------|------|-------|------|-------|------|-------|------|-------|------|
|                             | Day 3   |      | Day 5 |      | Day 7 |      | Day 9 |      | Day 3 |      | Day 5 |      | Day 7 |      | Day 9 |      |
| Propanal                    | 4.14    | 2.17 | 3.41  | 0.36 | 2.76  | 0.76 | 2.53  | 0.68 | 3.98  | 0.62 | 3.97  | 0.46 | 4.75  | 0.02 | 4.67  | 0.42 |
| Butanal                     | 0.41    | 0.18 | 0.49  | 0.03 | 0.36  | 0.05 | 0.37  | 0.11 | 0.33  | 0.06 | 0.38  | 0.04 | 0.34  | 0.03 | 0.47  | 0.03 |
| 2-Methylbutanal             | 0.04    | 0.01 | 0.09  | 0.00 | 0.05  | 0.02 | 0.08  | 0.02 | 0.04  | 0.02 | 0.09  | 0.01 | 0.07  | 0.02 | 0.08  | 0.00 |
| 3-Methylbutanal             | 0.05    | 0.01 | 0.16  | 0.01 | 0.11  | 0.02 | 0.15  | 0.03 | 0.08  | 0.03 | 0.15  | 0.02 | 0.08  | 0.01 | 0.14  | 0.03 |
| Pentanal                    | 0.27    | 0.06 | 0.31  | 0.03 | 0.21  | 0.03 | 0.23  | 0.02 | 0.19  | 0.03 | 0.25  | 0.03 | 0.18  | 0.02 | 0.22  | 0.00 |
| Hexanal                     | 1.53    | 0.30 | 1.31  | 0.10 | 0.78  | 0.07 | 1.06  | 0.11 | 1.49  | 0.31 | 1.36  | 0.42 | 1.21  | 0.21 | 1.40  | 0.18 |
| (E)-2-Pentenal              | 0.03    | 0.01 | 0.04  | 0.01 | 0.02  | 0.00 | 0.03  | 0.01 | 0.03  | 0.00 | 0.03  | 0.01 | 0.03  | 0.00 | 0.04  | 0.01 |
| Heptanal                    | 0.07    | 0.01 | 0.07  | 0.00 | 0.05  | 0.00 | 0.06  | 0.00 | 0.08  | 0.01 | 0.08  | 0.12 | 0.08  | 0.01 | 0.08  | 0.01 |
| (E)-2-Hexenal               | 0.05    | 0.01 | 0.06  | 0.01 | 0.04  | 0.00 | 0.04  | 0.01 | 0.15  | 0.02 | 0.14  | 0.06 | 0.09  | 0.01 | 0.09  | 0.01 |
| Octanal                     | 0.05    | 0.00 | 0.05  | 0.00 | 0.05  | 0.01 | 0.04  | 0.00 | 0.06  | 0.01 | 0.05  | 0.13 | 0.07  | 0.00 | 0.06  | 0.00 |
| Nonanal                     | 0.15    | 0.03 | 0.12  | 0.03 | 0.15  | 0.01 | 0.12  | 0.01 | 0.24  | 0.05 | 0.27  | 0.06 | 0.24  | 0.03 | 0.20  | 0.02 |
| 2,4-Heptadienal_isomer 1    | 0.14    | 0.02 | 0.15  | 0.02 | 0.11  | 0.03 | 0.13  | 0.02 | 0.11  | 0.03 | 0.11  | 0.04 | 0.12  | 0.02 | 0.18  | 0.03 |
| 2,4-Heptadienal_isomer 2    | 0.11    | 0.03 | 0.11  | 0.03 | 0.07  | 0.01 | 0.10  | 0.02 | 0.10  | 0.03 | 0.08  | 0.05 | 0.08  | 0.01 | 0.13  | 0.03 |
| Benzaldehyde                | 0.14    | 0.01 | 0.18  | 0.03 | 0.15  | 0.02 | 0.17  | 0.02 | 0.16  | 0.01 | 0.18  | 0.28 | 0.18  | 0.01 | 0.20  | 0.00 |
| Sum of Aldehydes            | 13.57   | 2.24 | 12.69 | 0.70 | 10.99 | 1.59 | 10.82 | 0.79 | 11.96 | 0.80 | 11.24 | 0.72 | 11.77 | 0.25 | 11.68 | 0.53 |
| Acetone                     | 8.94    | 1.50 | 12.43 | 1.78 | 8.81  | 1.62 | 10.70 | 2.38 | 11.56 | 1.54 | 17.97 | 2.63 | 23.21 | 3.17 | 16.93 | 3.22 |
| 2-Butanone                  | 0.14    | 0.03 | 1.48  | 0.49 | 1.10  | 0.22 | 0.51  | 0.13 | 0.17  | 0.02 | 0.32  | 0.14 | 0.41  | 0.03 | 0.27  | 0.04 |
| 2,3-Butanedione             | 0.17    | 0.03 | 0.18  | 0.02 | 0.16  | 0.04 | 0.15  | 0.03 | 0.17  | 0.03 | 0.15  | 0.02 | 0.15  | 0.02 | 0.23  | 0.02 |
| 2,3-Pentanedione            | 0.63    | 0.06 | 0.61  | 0.03 | 0.57  | 0.05 | 0.59  | 0.02 | 0.55  | 0.14 | 0.54  | 0.20 | 0.56  | 0.07 | 0.72  | 0.09 |
| 2,3-Hexanedione             | 0.08    | 0.01 | 0.09  | 0.00 | 0.07  | 0.01 | 0.10  | 0.02 | 0.05  | 0.01 | 0.05  | 0.03 | 0.05  | 0.01 | 0.06  | 0.00 |
| Acetoin                     | 2.09    | 0.38 | 2.09  | 0.45 | 0.98  | 0.26 | 0.94  | 0.10 | 2.86  | 0.50 | 0.87  | 0.28 | 0.68  | 0.11 | 3.06  | 0.24 |
| 2,3-Octanedione             | 0.04    | 0.01 | 0.04  | 0.01 | 0.03  | 0.00 | 0.04  | 0.00 | 0.06  | 0.01 | 0.06  | 0.02 | 0.04  | 0.01 | 0.05  | 0.01 |
| 6-Methyl-5-hepten-2-one     | 0.03    | 0.00 | 0.04  | 0.01 | 0.03  | 0.00 | 0.02  | 0.00 | 0.04  | 0.01 | 0.05  | 0.01 | 0.05  | 0.00 | 0.05  | 0.01 |
| 3,5-Octadien-2-one_isomer 1 | 0.15    | 0.03 | 0.29  | 0.06 | 0.14  | 0.01 | 0.24  | 0.02 | 0.10  | 0.03 | 0.09  | 0.05 | 0.09  | 0.01 | 0.17  | 0.05 |
| 3,5-Octadien-2-one_isomer 2 | 0.05    | 0.01 | 0.06  | 0.02 | 0.04  | 0.00 | 0.07  | 0.01 | 0.03  | 0.01 | 0.03  | 0.01 | 0.03  | 0.00 | 0.05  | 0.02 |



| Compound                            | January |      |       |      |       |      |       |      | July  |      |       |      |       |      |       |      |
|-------------------------------------|---------|------|-------|------|-------|------|-------|------|-------|------|-------|------|-------|------|-------|------|
|                                     | Day 3   |      | Day 5 |      | Day 7 |      | Day 9 |      | Day 3 |      | Day 5 |      | Day 7 |      | Day 9 |      |
| Acetophenone                        | 0.20    | 0.05 | 0.30  | 0.06 | 0.37  | 0.03 | 0.14  | 0.01 | 0.10  | 0.00 | 0.11  | 0.04 | 0.13  | 0.01 | 0.10  | 0.02 |
| Sum of Ketones                      | 12.52   | 1.55 | 17.62 | 1.91 | 12.29 | 1.66 | 13.49 | 2.39 | 15.69 | 1.63 | 20.22 | 2.65 | 25.39 | 3.18 | 21.69 | 3.24 |
| Hexane                              | 0.14    | 0.01 | 0.14  | 0.03 | 0.14  | 0.02 | 0.08  | 0.01 | 0.15  | 0.05 | 0.15  | 0.19 | 0.33  | 0.02 | 0.22  | 0.02 |
| Heptane, 2,4-dimethyl-              | 0.17    | 0.08 | 0.50  | 0.18 | 0.11  | 0.04 | 0.11  | 0.01 | 0.07  | 0.04 | 0.05  | 0.25 | 0.10  | 0.03 | 0.16  | 0.02 |
| Heptane, 2,2,4,6,6-pentamethyl-     | 0.59    | 0.30 | 1.63  | 0.69 | 0.47  | 0.14 | 0.27  | 0.04 | 0.34  | 0.17 | 0.51  | 0.10 | 2.56  | 0.57 | 1.64  | 0.40 |
| Decane                              | 0.39    | 0.15 | 0.70  | 0.27 | 0.29  | 0.07 | 0.16  | 0.01 | 0.23  | 0.08 | 0.31  | 0.14 | 1.09  | 0.21 | 0.77  | 0.14 |
| Alkane_1011                         | 0.26    | 0.09 | 0.38  | 0.15 | 0.18  | 0.04 | 0.10  | 0.02 | 0.10  | 0.03 | 0.13  | 0.11 | 0.32  | 0.04 | 0.26  | 0.04 |
| Alkane_1036                         | 0.29    | 0.09 | 0.30  | 0.12 | 0.19  | 0.02 | 0.11  | 0.02 | 0.06  | 0.02 | 0.08  | 0.33 | 0.09  | 0.01 | 0.13  | 0.05 |
| Alkane_1041                         | 0.12    | 0.04 | 0.13  | 0.05 | 0.08  | 0.01 | 0.04  | 0.01 | 0.06  | 0.02 | 0.08  | 0.09 | 0.03  | 0.00 | 0.04  | 0.02 |
| Alkane_1083                         | 0.17    | 0.03 | 0.14  | 0.05 | 0.13  | 0.01 | 0.07  | 0.01 | 0.06  | 0.01 | 0.07  | 0.31 | 0.08  | 0.01 | 0.09  | 0.03 |
| Alkane_1088                         | 0.09    | 0.01 | 0.07  | 0.03 | 0.07  | 0.00 | 0.04  | 0.01 | 0.03  | 0.01 | 0.03  | 0.16 | 0.03  | 0.01 | 0.04  | 0.01 |
| Undecane                            | 0.22    | 0.02 | 0.31  | 0.08 | 0.18  | 0.02 | 0.12  | 0.01 | 0.20  | 0.04 | 0.25  | 0.03 | 0.46  | 0.02 | 0.36  | 0.05 |
| Dodecane                            | 0.64    | 0.05 | 0.79  | 0.23 | 0.55  | 0.10 | 0.34  | 0.02 | 0.49  | 0.11 | 0.72  | 0.09 | 1.43  | 0.17 | 1.11  | 0.19 |
| Alkane_1250                         | 0.32    | 0.03 | 0.15  | 0.04 | 0.28  | 0.04 | 0.22  | 0.02 | 0.33  | 0.05 | 0.35  | 0.11 | 0.29  | 0.06 | 0.25  | 0.06 |
| Tridecane                           | 0.27    | 0.03 | 0.21  | 0.01 | 0.23  | 0.04 | 0.18  | 0.01 | 0.23  | 0.03 | 0.26  | 0.06 | 0.31  | 0.04 | 0.27  | 0.02 |
| Tetradecane                         | 0.09    | 0.01 | 0.07  | 0.01 | 0.09  | 0.02 | 0.07  | 0.00 | 0.10  | 0.02 | 0.09  | 0.01 | 0.11  | 0.02 | 0.10  | 0.01 |
| Alkane_1490                         | 1.94    | 0.12 | 2.24  | 0.64 | 1.86  | 0.14 | 2.37  | 0.16 | 1.43  | 0.24 | 1.98  | 0.36 | 1.06  | 0.18 | 2.03  | 0.55 |
| Pentadecane                         | 0.21    | 0.02 | 0.29  | 0.04 | 0.21  | 0.02 | 0.13  | 0.02 | 0.30  | 0.09 | 0.38  | 0.09 | 0.52  | 0.06 | 0.43  | 0.02 |
| Pentadecane, 2,6,10,14-tetramethyl- | 1.48    | 0.08 | 1.75  | 0.40 | 1.69  | 0.40 | 1.23  | 0.08 | 1.94  | 0.37 | 2.76  | 1.18 | 2.35  | 0.76 | 2.54  | 0.60 |
| Heptadecane                         | 0.39    | 0.02 | 0.55  | 0.01 | 0.47  | 0.03 | 0.33  | 0.04 | 0.52  | 0.13 | 0.64  | 0.26 | 0.78  | 0.26 | 0.73  | 0.26 |
| Sum of Aliphatic Hydrocarbons       | 7.79    | 0.41 | 10.35 | 1.12 | 7.21  | 0.47 | 5.96  | 0.20 | 6.63  | 0.53 | 8.85  | 1.41 | 11.96 | 1.05 | 11.15 | 0.99 |
| Benzene                             | 0.18    | 0.03 | 0.17  | 0.02 | 0.15  | 0.02 | 0.10  | 0.01 | 0.07  | 0.06 | 0.11  | 0.10 | 0.16  | 0.01 | 0.15  | 0.03 |
| Toluene                             | 0.54    | 0.08 | 1.34  | 0.39 | 0.69  | 0.08 | 0.36  | 0.03 | 0.27  | 0.07 | 0.27  | 0.29 | 0.68  | 0.14 | 0.45  | 0.09 |
| Ethylbenzene                        | 0.21    | 0.02 | 0.38  | 0.11 | 0.17  | 0.02 | 0.13  | 0.01 | 0.16  | 0.04 | 0.20  | 0.07 | 0.61  | 0.21 | 0.36  | 0.11 |
| p-Xylene                            | 0.08    | 0.01 | 0.10  | 0.03 | 0.06  | 0.01 | 0.04  | 0.00 | 0.09  | 0.03 | 0.08  | 0.02 | 0.13  | 0.03 | 0.08  | 0.01 |

| Compound                     | January |      |       |      |       |      |       |      | July  |      |       |      |       |      |       |      |
|------------------------------|---------|------|-------|------|-------|------|-------|------|-------|------|-------|------|-------|------|-------|------|
|                              | Day 3   |      | Day 5 |      | Day 7 |      | Day 9 |      | Day 3 |      | Day 5 |      | Day 7 |      | Day 9 |      |
| m-Xylene                     | 0.24    | 0.01 | 0.32  | 0.09 | 0.20  | 0.03 | 0.13  | 0.00 | 0.23  | 0.06 | 0.23  | 0.08 | 0.44  | 0.09 | 0.28  | 0.06 |
| o-Xylene                     | 0.15    | 0.01 | 0.20  | 0.06 | 0.12  | 0.02 | 0.09  | 0.00 | 0.14  | 0.03 | 0.15  | 0.03 | 0.30  | 0.06 | 0.19  | 0.04 |
| Styrene                      | 0.11    | 0.03 | 0.36  | 0.13 | 0.11  | 0.02 | 0.07  | 0.01 | 0.06  | 0.01 | 0.16  | 0.07 | 0.71  | 0.26 | 0.45  | 0.16 |
| Naphthalene                  | 0.07    | 0.01 | 0.08  | 0.01 | 0.07  | 0.00 | 0.05  | 0.00 | 0.08  | 0.01 | 0.10  | 0.02 | 0.11  | 0.01 | 0.09  | 0.01 |
| Sum of Aromatic Hydrocarbons | 1.58    | 0.09 | 2.94  | 0.45 | 1.57  | 0.10 | 0.98  | 0.04 | 1.09  | 0.12 | 1.31  | 0.34 | 3.15  | 0.37 | 2.05  | 0.23 |
| Methyl acetate               | 0.02    | 0.01 | 0.02  | 0.01 | 0.09  | 0.02 | 0.07  | 0.02 | 0.01  | 0.00 | 0.01  | 0.09 | 0.02  | 0.00 | 0.02  | 0.00 |
| Ethyl acetate                | 0.65    | 0.07 | 0.69  | 0.12 | 0.99  | 0.18 | 3.58  | 2.46 | 0.28  | 0.09 | 0.29  | 1.61 | 0.50  | 0.02 | 0.44  | 0.19 |
| 3-Methylbutyl acetate        | 0.02    | 0.00 | 0.02  | 0.00 | 0.02  | 0.00 | 0.01  | 0.00 | 0.04  | 0.01 | 0.04  | 0.02 | 0.04  | 0.00 | 0.03  | 0.01 |
| Ethyl 2-hydroxypropanoate    | 0.47    | 0.41 | 0.20  | 0.05 | 0.27  | 0.09 | 0.23  | 0.10 | 0.11  | 0.02 | 0.04  | 0.13 | 0.11  | 0.04 | 0.09  | 0.02 |
| Ethyl decanoate              | 0.05    | 0.03 | 0.03  | 0.00 | 0.04  | 0.01 | 0.03  | 0.00 | 0.03  | 0.00 | 0.04  | 0.02 | 0.03  | 0.02 | 0.02  | 0.00 |
| Sum of Esters                | 1.20    | 0.42 | 0.96  | 0.13 | 1.40  | 0.20 | 3.93  | 2.46 | 0.46  | 0.09 | 0.41  | 1.62 | 0.71  | 0.05 | 0.60  | 0.19 |
| Acetic acid                  | 0.46    | 0.05 | 0.62  | 0.18 | 0.73  | 0.20 | 0.73  | 0.20 | 1.09  | 0.32 | 0.47  | 0.30 | 0.85  | 0.43 | 0.72  | 0.20 |
| Propanoic acid               | 0.03    | 0.00 | 0.04  | 0.01 | 0.04  | 0.00 | 0.04  | 0.01 | 0.04  | 0.00 | 0.04  | 0.00 | 0.05  | 0.00 | 0.06  | 0.01 |
| Butanoic acid                | 0.22    | 0.04 | 0.26  | 0.03 | 0.30  | 0.12 | 0.29  | 0.10 | 0.40  | 0.02 | 0.32  | 0.07 | 0.37  | 0.03 | 0.45  | 0.08 |
| 3-Methylbutanoic acid        | 0.01    | 0.00 | 0.13  | 0.04 | 0.07  | 0.04 | 0.10  | 0.03 | 0.02  | 0.00 | 0.02  | 0.01 | 0.03  | 0.01 | 0.08  | 0.02 |
| Hexanoic acid                | 0.08    | 0.01 | 0.19  | 0.05 | 0.06  | 0.01 | 0.12  | 0.05 | 0.28  | 0.07 | 0.18  | 0.04 | 0.24  | 0.06 | 0.18  | 0.03 |
| Octanoic acid                | 0.03    | 0.00 | 0.04  | 0.04 | 0.02  | 0.01 | 0.03  | 0.02 | 0.19  | 0.03 | 0.14  | 0.04 | 0.08  | 0.01 | 0.09  | 0.02 |
| Nonanoic acid                | 0.06    | 0.00 | 0.07  | 0.09 | 0.05  | 0.01 | 0.06  | 0.03 | 0.37  | 0.08 | 0.26  | 0.08 | 0.15  | 0.01 | 0.17  | 0.03 |
| Sum of Acids                 | 0.90    | 0.07 | 1.37  | 0.22 | 1.28  | 0.24 | 1.37  | 0.23 | 2.39  | 0.34 | 1.43  | 0.33 | 1.77  | 0.44 | 1.76  | 0.22 |
| a-Pinene                     | 0.27    | 0.08 | 0.65  | 0.24 | 0.22  | 0.06 | 0.12  | 0.02 | 0.19  | 0.05 | 0.22  | 0.13 | 0.86  | 0.26 | 0.47  | 0.11 |
| b-Pinene                     | 0.03    | 0.00 | 0.06  | 0.02 | 0.03  | 0.01 | 0.02  | 0.00 | 0.03  | 0.01 | 0.04  | 0.01 | 0.09  | 0.01 | 0.06  | 0.01 |
| Thuja-2,4(10)-diene          | 0.02    | 0.00 | 0.02  | 0.00 | 0.02  | 0.00 | 0.01  | 0.00 | 0.04  | 0.00 | 0.04  | 0.02 | 0.04  | 0.00 | 0.03  | 0.00 |
| 3-Carene                     | 0.04    | 0.00 | 0.05  | 0.01 | 0.03  | 0.01 | 0.03  | 0.00 | 0.06  | 0.01 | 0.07  | 0.01 | 0.10  | 0.01 | 0.07  | 0.01 |
| b-Myrcene                    | 0.05    | 0.00 | 0.06  | 0.01 | 0.04  | 0.01 | 0.04  | 0.01 | 0.09  | 0.02 | 0.01  | 0.01 | 0.13  | 0.02 | 0.09  | 0.01 |
| D-Limonene                   | 1.82    | 0.20 | 1.64  | 0.09 | 1.53  | 0.19 | 1.63  | 0.41 | 3.30  | 0.42 | 3.59  | 1.55 | 3.43  | 0.20 | 2.61  | 0.39 |

| Compound                | January |      |       |      |       |      |       |      | July  |      |       |      |       |      |       |      |
|-------------------------|---------|------|-------|------|-------|------|-------|------|-------|------|-------|------|-------|------|-------|------|
|                         | Day 3   |      | Day 5 |      | Day 7 |      | Day 9 |      | Day 3 |      | Day 5 |      | Day 7 |      | Day 9 |      |
| g-Terpinene             | 0.08    | 0.03 | 0.17  | 0.07 | 0.06  | 0.02 | 0.03  | 0.00 | 0.03  | 0.02 | 0.05  | 0.00 | 0.14  | 0.05 | 0.10  | 0.02 |
| p-Cymene                | 0.27    | 0.07 | 0.50  | 0.21 | 0.18  | 0.05 | 0.10  | 0.01 | 0.14  | 0.06 | 0.20  | 0.08 | 0.62  | 0.25 | 0.39  | 0.10 |
| Terpene_alcohol_1476    | 0.08    | 0.02 | 0.24  | 0.10 | 0.07  | 0.02 | 0.05  | 0.00 | 0.07  | 0.01 | 0.06  | 0.02 | 0.09  | 0.04 | 0.05  | 0.00 |
| b-Gurjunene             | 0.15    | 0.01 | 0.21  | 0.05 | 0.14  | 0.02 | 0.10  | 0.01 | 0.19  | 0.05 | 0.27  | 0.04 | 0.36  | 0.06 | 0.31  | 0.06 |
| Calamenene              | 0.04    | 0.00 | 0.05  | 0.00 | 0.04  | 0.00 | 0.03  | 0.01 | 0.07  | 0.01 | 0.09  | 0.01 | 0.09  | 0.02 | 0.08  | 0.01 |
| Sum of Terpenoids       | 2.85    | 0.23 | 3.66  | 0.36 | 2.36  | 0.21 | 2.16  | 0.41 | 4.21  | 0.43 | 4.62  | 1.56 | 5.96  | 0.42 | 4.26  | 0.42 |
| Trimethylamine          | 1.62    | 2.62 | 0.20  | 0.21 | 2.46  | 1.84 | 5.39  | 0.52 | 0.30  | 0.18 | 2.38  | 1.98 | 0.40  | 0.32 | 6.84  | 1.59 |
| 2-Ethylfuran            | 0.08    | 0.02 | 0.07  | 0.01 | 0.06  | 0.01 | 0.07  | 0.01 | 0.09  | 0.01 | 0.07  | 0.02 | 0.08  | 0.01 | 0.09  | 0.01 |
| 2-Pentylfuran           | 0.02    | 0.00 | 0.03  | 0.01 | 0.02  | 0.00 | 0.01  | 0.00 | 0.04  | 0.02 | 0.06  | 0.04 | 0.05  | 0.00 | 0.03  | 0.02 |
| 2,4,6-Trimethylpyridine | 0.14    | 0.02 | 0.09  | 0.03 | 0.15  | 0.12 | 0.06  | 0.04 | 0.06  | 0.01 | 0.07  | 0.00 | 0.15  | 0.10 | 0.07  | 0.01 |
| Sum of Miscellaneous    | 1.86    | 2.62 | 0.39  | 0.21 | 2.68  | 1.85 | 5.53  | 0.52 | 0.48  | 0.18 | 2.57  | 1.98 | 0.69  | 0.33 | 7.04  | 1.59 |

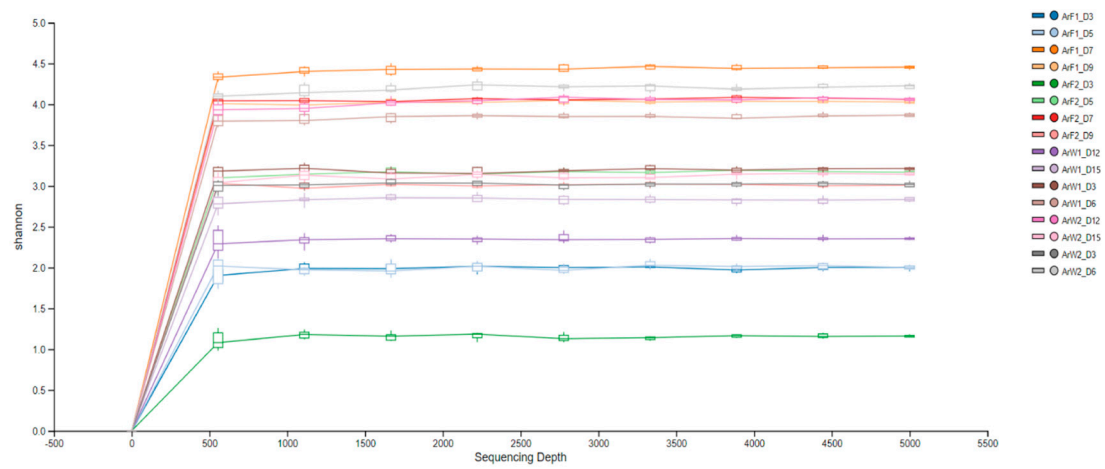

**Figure S1.** Shannon-Wiener rarefaction curves of whole (ArW) and filleted (ArF) chill-stored meagre caught in January (1) and July (2) at intervals of storage time, obtained through 10 sampling depths.

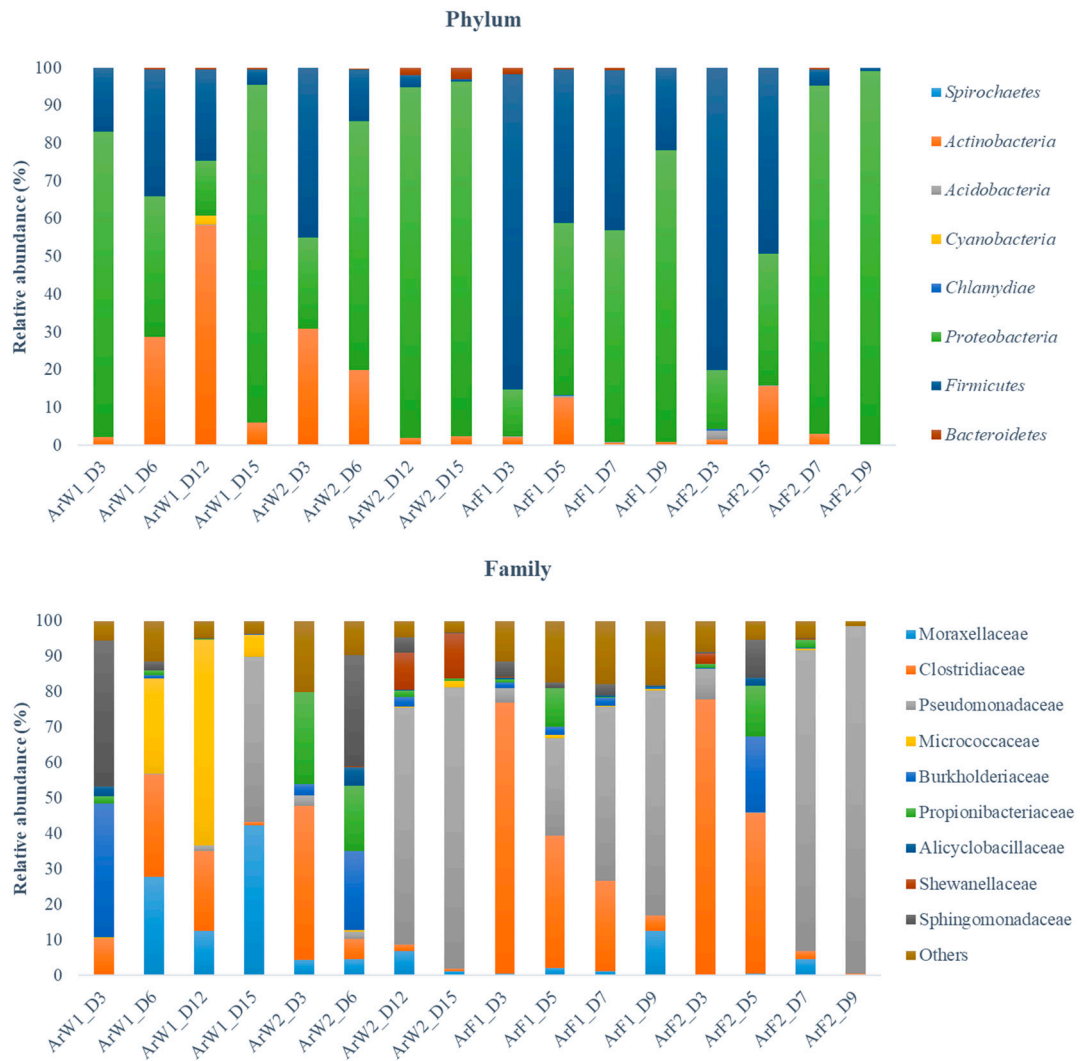

**Figure S2.** Relative abundance (%) of bacterial phyla (upper) and families (down) of whole (ArW) and filleted (ArF) chill-stored meagre caught in January (1) and July (2), obtained through metabarcoding analysis of 16S rRNA gene at intervals of storage time.

**A**

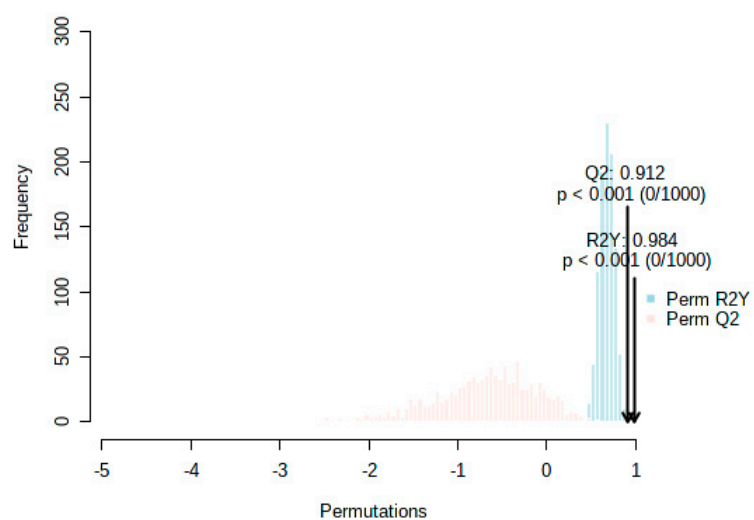

**B**

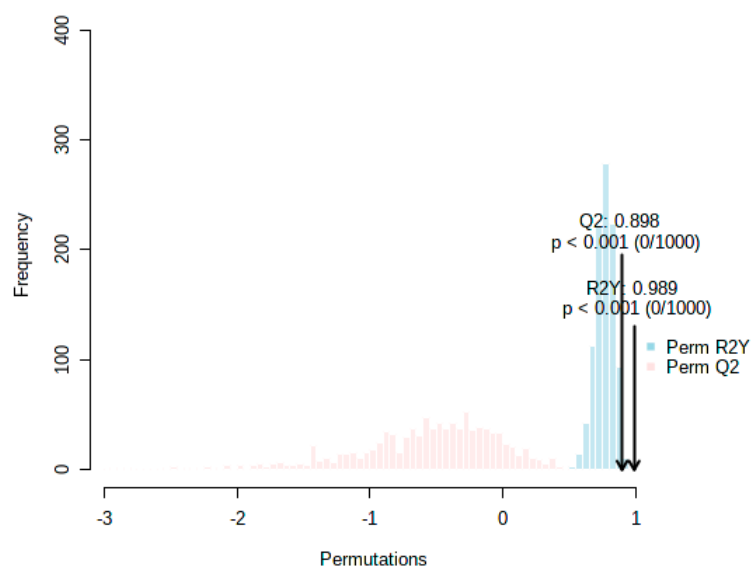

**Figure S3.** Permutation analysis showing the observed and cross-validated R2Y and Q2 coefficients of OPLS-DA model for (A) whole and (B) filleted meagre.

A

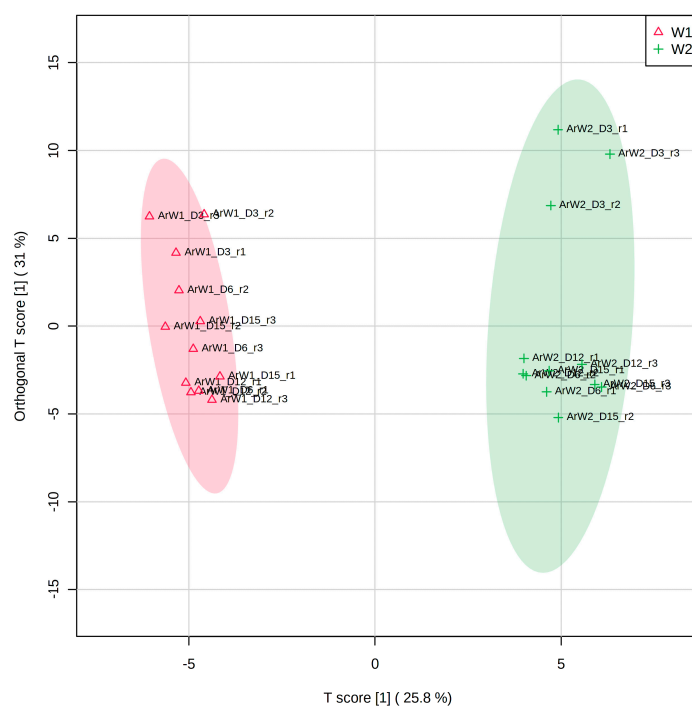

B

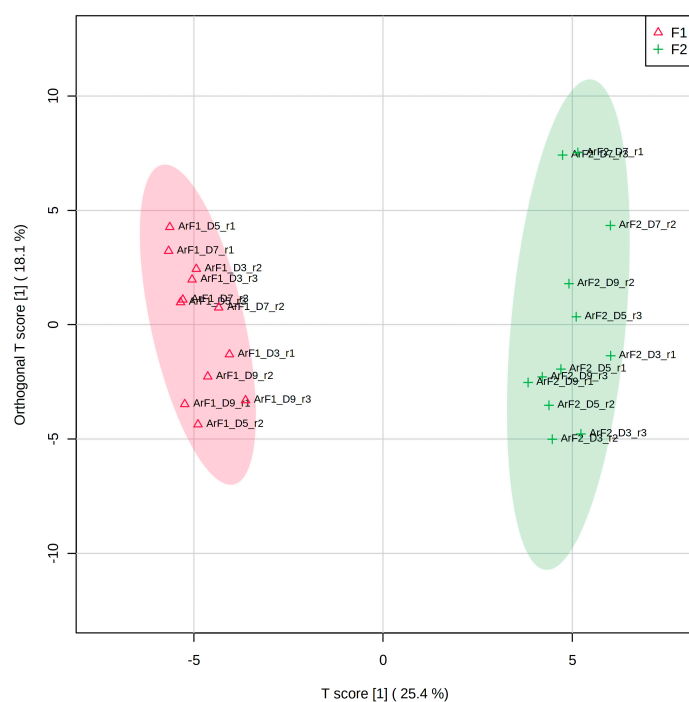

**Figure S4.** Effect of seasonal variation on the volatile compounds of meagre. OPLS-DA score plot of (A) whole meagre caught in January (ArW1) and July (ArW2), (B) filleted meagre caught in January (ArF1) and July (ArF2). The percentage of the explained response variance is indicated in parentheses. The shaded ellipses correspond to the 95% confidence regions of each class.
